# Supplementary material for: Development and Validation of a Risk Score for Post-Transplant Lymphoproliferative Disorders among Solid Organ Transplant Recipients
Source: MDPI journal article supplement (doi:10.3390/cancers14133279), 2022-07-04
Supplement: s1 [file s1]

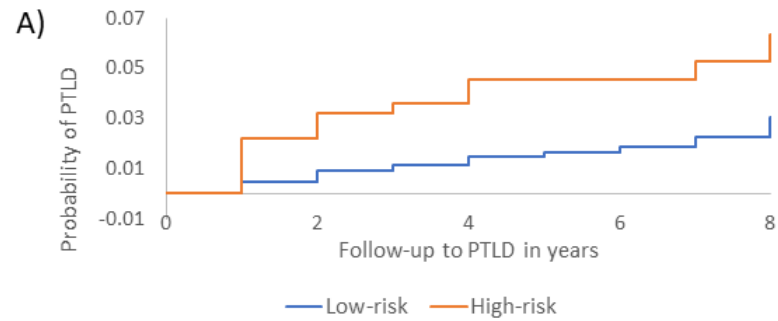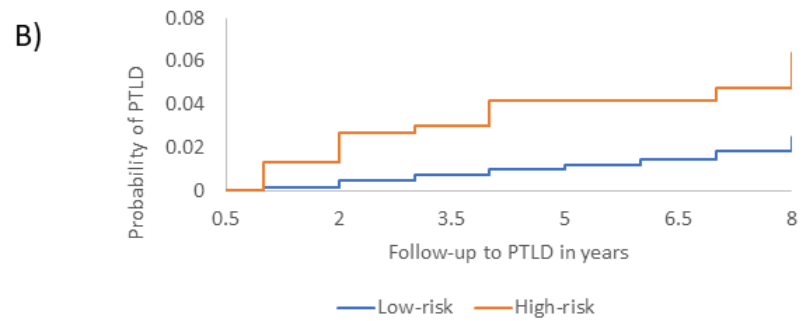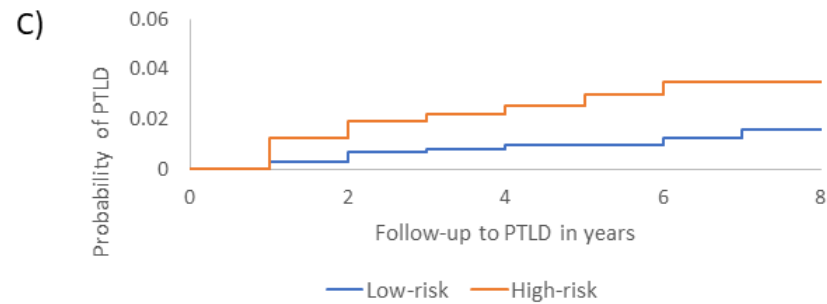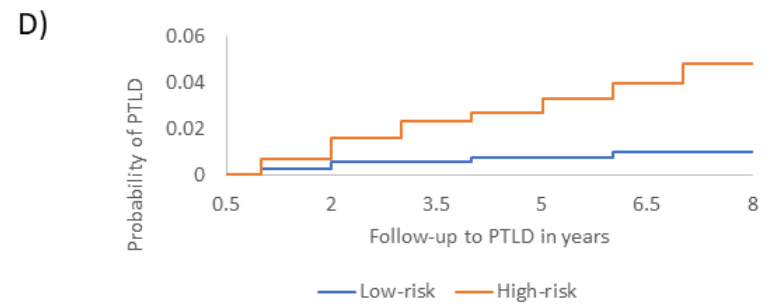

| Time (years) | Number of patients at risk |           |          |           |
|--------------|----------------------------|-----------|----------|-----------|
|              | MATCH                      |           | STCS     |           |
|              | Low risk                   | High-risk | Low risk | High-risk |
| 0            | 2122                       | 424       | 1084     | 445       |
| 2.0          | 1498                       | 260       | 868      | 320       |
| 4.0          | 1107                       | 187       | 611      | 214       |
| 6.0          | 808                        | 138       | 407      | 130       |
| 8.0          | 570                        | 84        | 198      | 66        |

| Time (years) | Number of patients at risk |           |          |           |
|--------------|----------------------------|-----------|----------|-----------|
|              | MATCH                      |           | STCS     |           |
|              | Low risk                   | High-risk | Low risk | High-risk |
| 0.5          | 1787                       | 469       | 1083     | 443       |
| 2.0          | 1433                       | 325       | 868      | 320       |
| 3.5          | 1137                       | 248       | 667      | 237       |
| 5.0          | 908                        | 197       | 497      | 165       |
| 6.5          | 727                        | 146       | 358      | 111       |
| 8.0          | 541                        | 113       | 198      | 66        |
